# Supplementary material for: Prevalence of Low Muscle Mass in the Computed Tomography at the Third Lumbar Vertebra Level Depends on Chosen Cut-Off in 200 Hospitalised Patients—A Prospective Observational Trial
Source: MDPI journal article supplement (doi:10.3390/nu14163446), 2022-08-22
Supplement: s1 [file s1]

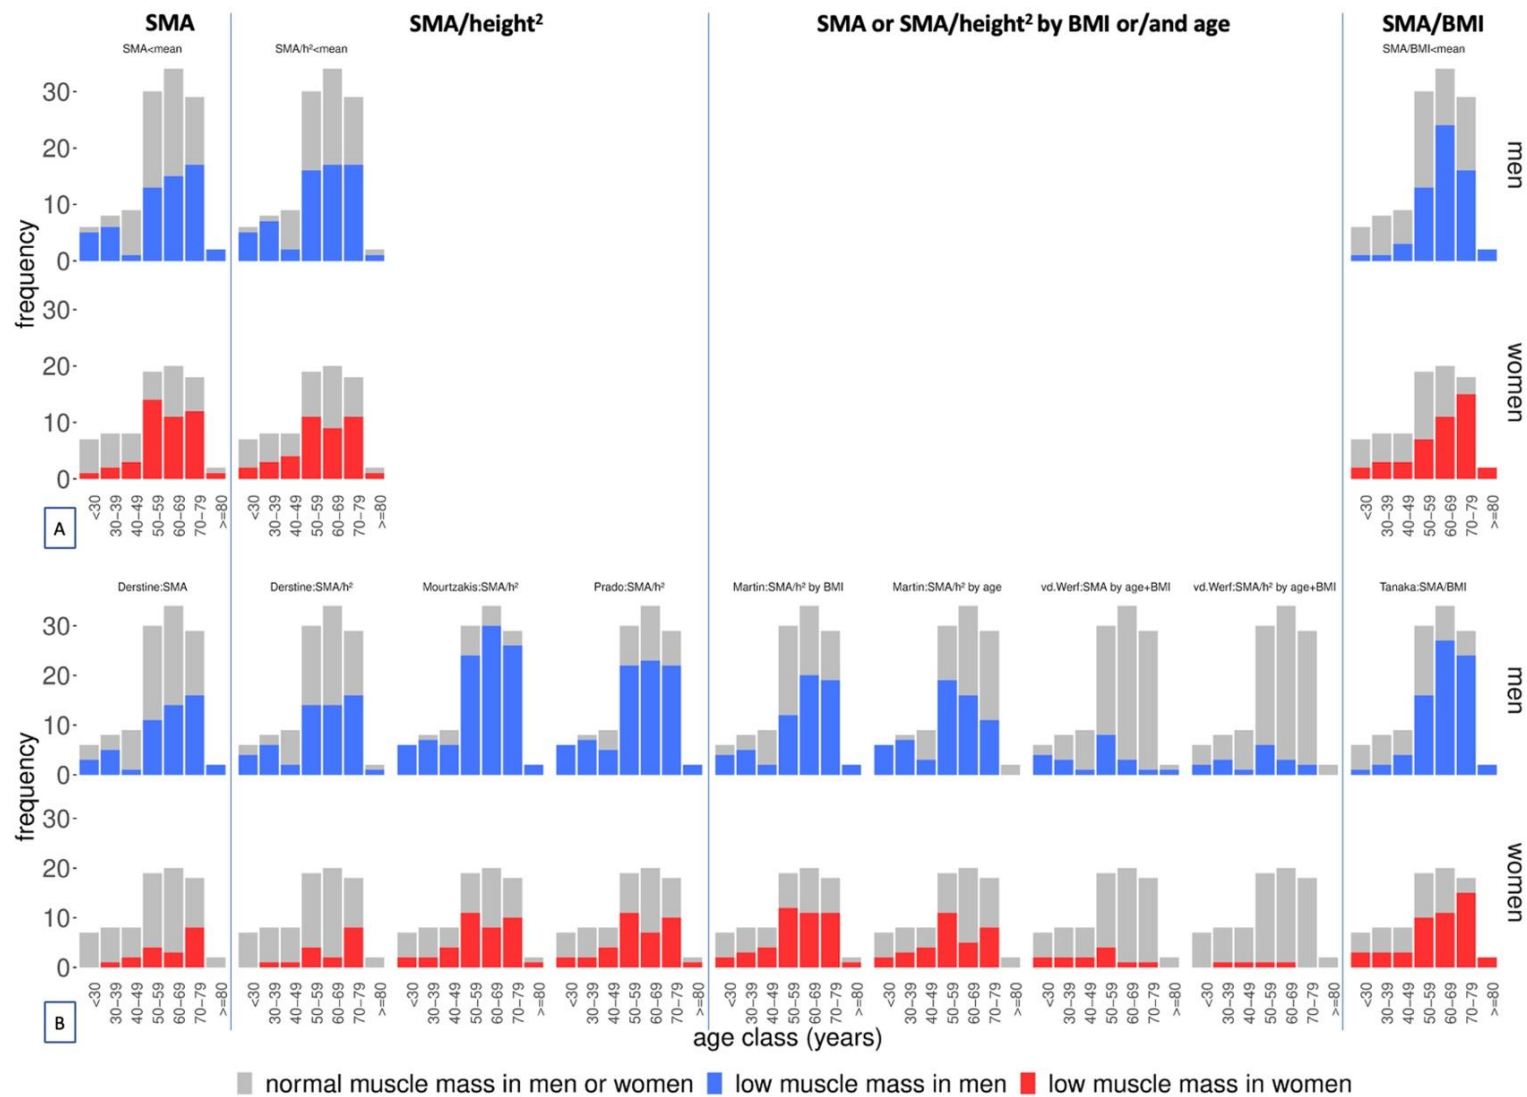

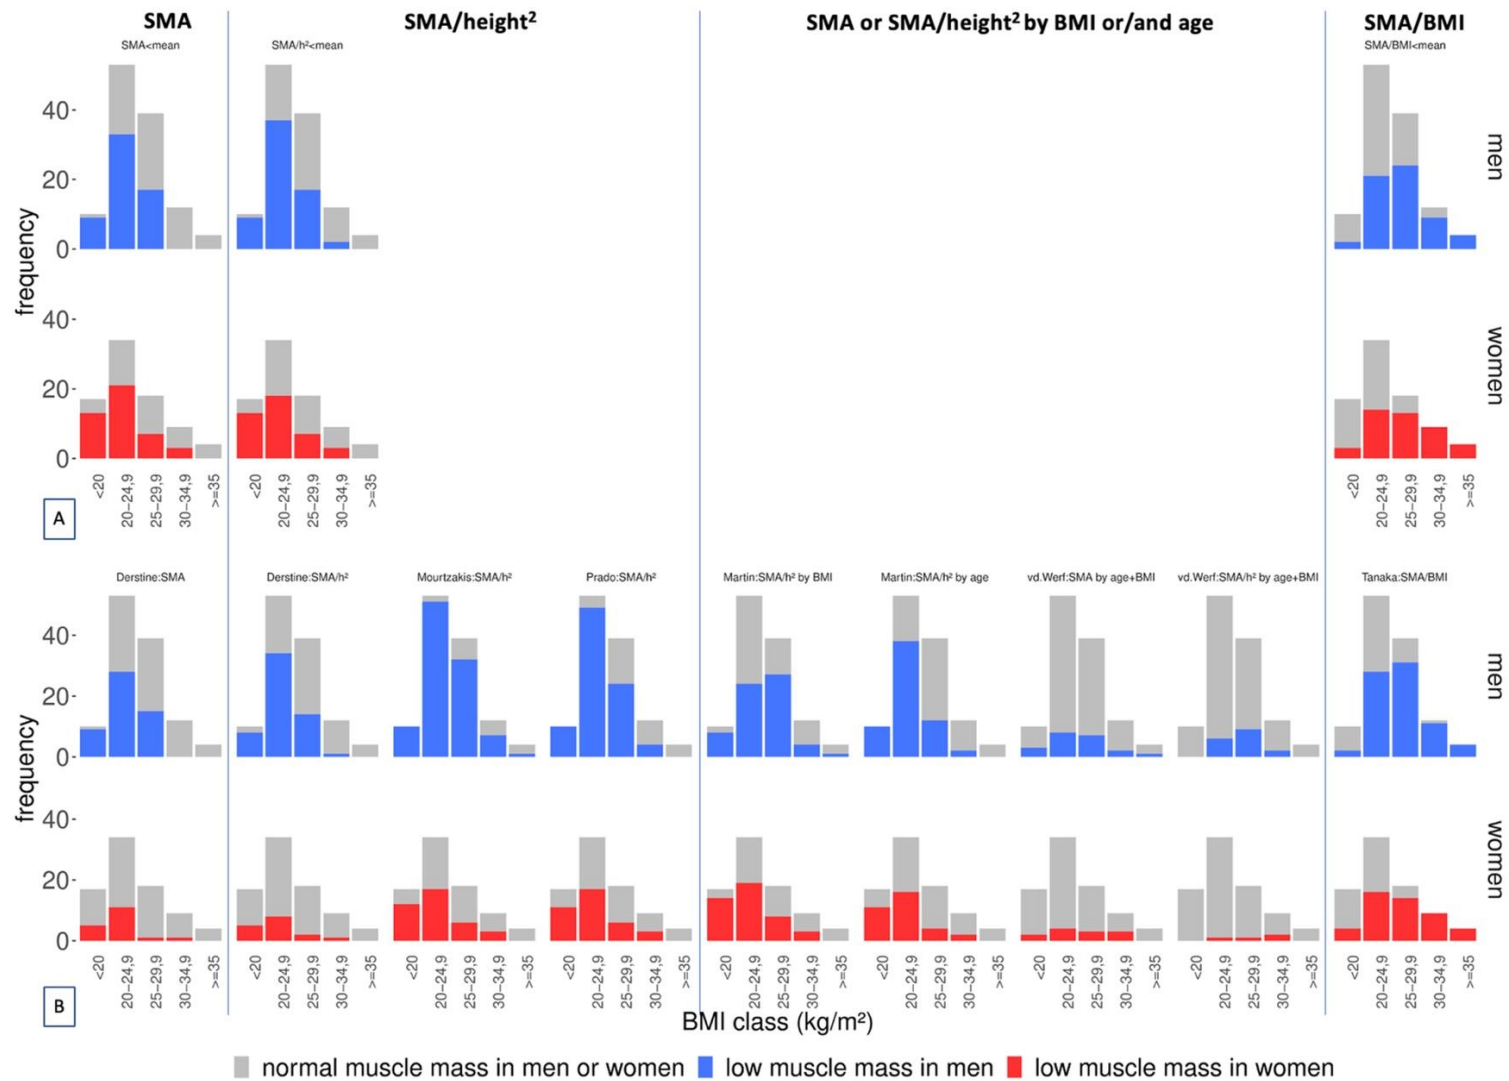

**Figure S2.** Absolute prevalence of low muscle mass in our study population (n=200) across BMI classes according to (A) cut-offs set at the mean of our study population or to (B) previously published cut-offs
