# Supplementary material for: Prevalence of Low Muscle Mass in the Computed Tomography at the Third Lumbar Vertebra Level Depends on Chosen Cut-Off in 200 Hospitalised Patients—A Prospective Observational Trial
Source: Nutrients. 2022 Aug 22;14(16):3446. doi: 10.3390/nu14163446 (PMC9413680; doi:10.3390/nu14163446)
Supplement: Supplementary file 1 [file nutrients-14-03446-s001.zip › nutrients-1864702-Supplementary Table.xlsx]

## Sheet: Sheet1
ID	sex	age	height (cm)	weight (kg)	BMI (kg/m²)	SMA (cm²)	SMA<mean	SMA/h² (cm²/m²)	SMA/h²<mean	SMA/BMI (cm²/(kg/m²))	SMA/BMI<mean	Derstine:SMA	Derstine:SMA/h²	Mourtzakis:SMA/h²	Prado:SMA/h²	Martin:SMA/h² by BMI	Martin:SMA/h² by age	vd.Werf:SMA by age+BMI	vd.Werf:SMA/h² by age+BMI	Tanaka:SMA/BMI
115	men	19.7068	175	64	20.898	147.6	1	48.1959	0	7.06289	0	0	0	1	1	0	1	0	0	0
97	men	23.0411	176	66	21.3068	145.1	1	46.8427	1	6.81003	0	0	0	1	1	0	1	1	0	0
103	men	25.9699	175	58	18.9388	121.8	1	39.7714	1	6.43125	0	1	1	1	1	1	1	1	0	0
50	men	26.2356	180	69	21.2963	135	1	41.6667	1	6.33913	0	1	1	1	1	1	1	1	1	0
54	men	28.4846	179	82.6	25.7795	135.2	1	42.1959	1	5.24448	1	1	1	1	1	1	1	1	1	1
69	men	29.7452	197	87.9	22.6494	165.9	0	42.7478	1	7.3247	0	0	1	1	1	1	1	0	0	0
12	men	82.2411	169	77	26.9598	140	1	49.0179	0	5.19291	1	1	0	1	1	1	0	0	0	1
91	men	86.2137	166	71.7	26.0197	121.1	1	43.9469	1	4.65416	1	1	1	1	1	1	0	1	0	1
93	women	21.411	171	64	21.8871	143.7	0	49.1433	0	6.56552	0	0	0	0	0	0	0	0	0	0
117	women	23.2603	172	66.6	22.5122	151.8	0	51.3115	0	6.74302	0	0	0	0	0	0	0	0	0	0
68	women	24.8343	172	69.4	23.4586	103.4	1	34.9513	1	4.40776	1	0	0	1	1	1	1	0	0	1
10	women	27.1644	164.5	53.4	19.7337	120	0	44.3455	0	6.08096	0	0	0	0	0	0	0	0	0	0
63	women	27.1781	164	68.9	25.6172	118.4	0	44.0214	0	4.6219	0	0	0	0	0	0	0	1	0	1
78	women	27.2849	170	98.2	33.9792	133.9	0	46.3322	0	3.94064	1	0	0	0	0	0	0	1	0	1
21	women	27.9233	178	63.6	20.0732	119	0	37.5584	1	5.9283	0	0	0	1	1	1	1	0	0	0
173	women	81.9802	163	85	31.9922	101.7	1	38.2777	1	3.1789	1	0	0	1	1	1	0	0	0	1
108	women	84.9641	156	75.6	31.0651	125.3	0	51.4875	0	4.03347	1	0	0	0	0	0	0	0	0	1
